# Supplementary material
Source: ML conference proceedings conference paper supplement (https://proceedings.neurips.cc/paper_files/paper/2010/hash/d93ed5b6db83be78efb0d05ae420158e-Abstract.html)
Supplement: Supplementary file [file d93ed5b6db83be78efb0d05ae420158e-Supplemental.zip]

# Active Learning Applied to Patient-Adaptive Heartbeat Classification

**Jenna Wiens**  
CSAIL, MIT

jwiens@csail.mit.edu

**John V. Guttag**  
CSAIL, MIT

gutttag@csail.mit.edu

There was a typo in Table 4, that lead to an erroneous column. The corrected table is below.

| Active vs. Passive VEB Classification Results |          |      |        |    |    |         |      |        |     |     |  |
|-----------------------------------------------|----------|------|--------|----|----|---------|------|--------|-----|-----|--|
|                                               | Proposed |      |        |    |    | Passive |      |        |     |     |  |
|                                               | # Q      | TP   | TN     | FP | FN | # Q     | TP   | TN     | FP  | FN  |  |
| 100                                           | 22       | 1    | 2269   | 0  | 0  | 500     | 0    | 2269   | 0   | 1   |  |
| 101                                           | 19       | 0    | 1861   | 0  | 0  | 500     | 0    | 1861   | 0   | 0   |  |
| 102                                           | 28       | 4    | 2181   | 0  | 0  | 500     | 3    | 2181   | 0   | 1   |  |
| 103                                           | 20       | 0    | 2082   | 0  | 0  | 500     | 0    | 2082   | 0   | 0   |  |
| 104                                           | 30       | 2    | 2224   | 0  | 0  | 500     | 1    | 2224   | 0   | 1   |  |
| 105                                           | 54       | 41   | 2522   | 0  | 0  | 500     | 41   | 2521   | 1   | 0   |  |
| 106                                           | 50       | 520  | 1506   | 0  | 0  | 500     | 507  | 1506   | 0   | 13  |  |
| 107                                           | 31       | 59   | 2076   | 0  | 0  | 500     | 11   | 2076   | 0   | 48  |  |
| 108                                           | 52       | 17   | 1744   | 0  | 0  | 500     | 17   | 1740   | 4   | 0   |  |
| 109                                           | 45       | 38   | 2492   | 0  | 0  | 500     | 36   | 2492   | 0   | 2   |  |
| 111                                           | 22       | 1    | 2122   | 0  | 0  | 500     | 0    | 2122   | 0   | 1   |  |
| 112                                           | 20       | 0    | 2537   | 0  | 0  | 500     | 0    | 2537   | 0   | 0   |  |
| 113                                           | 19       | 0    | 1793   | 0  | 0  | 500     | 0    | 1793   | 0   | 0   |  |
| 114                                           | 51       | 43   | 1835   | 0  | 0  | 500     | 42   | 1833   | 2   | 1   |  |
| 115                                           | 20       | 0    | 1951   | 0  | 0  | 500     | 0    | 1951   | 0   | 0   |  |
| 116                                           | 34       | 109  | 2301   | 0  | 0  | 500     | 106  | 2301   | 0   | 3   |  |
| 117                                           | 20       | 0    | 1533   | 0  | 0  | 500     | 0    | 1533   | 0   | 0   |  |
| 118                                           | 30       | 16   | 2260   | 0  | 0  | 500     | 4    | 2260   | 0   | 12  |  |
| 119                                           | 32       | 444  | 1542   | 0  | 0  | 500     | 444  | 1542   | 0   | 0   |  |
| 121                                           | 24       | 1    | 1860   | 0  | 0  | 500     | 0    | 1860   | 0   | 1   |  |
| 122                                           | 20       | 0    | 2473   | 0  | 0  | 500     | 0    | 2473   | 0   | 0   |  |
| 123                                           | 26       | 3    | 1513   | 0  | 0  | 500     | 3    | 1513   | 0   | 0   |  |
| 124                                           | 32       | 41   | 1570   | 0  | 6  | 500     | 30   | 1570   | 0   | 17  |  |
| 200                                           | 124      | 825  | 1773   | 0  | 1  | 500     | 799  | 1773   | 0   | 27  |  |
| 201                                           | 45       | 198  | 1764   | 0  | 0  | 500     | 0    | 1764   | 0   | 198 |  |
| 202                                           | 41       | 19   | 2115   | 0  | 0  | 500     | 19   | 2114   | 1   | 0   |  |
| 203                                           | 103      | 410  | 2517   | 15 | 34 | 500     | 397  | 2453   | 79  | 47  |  |
| 205                                           | 36       | 70   | 2583   | 0  | 1  | 500     | 65   | 2583   | 0   | 6   |  |
| 207                                           | 109      | 203  | 2115   | 4  | 7  | 500     | 190  | 2060   | 59  | 20  |  |
| 208                                           | 90       | 986  | 1958   | 0  | 6  | 500     | 977  | 1953   | 5   | 15  |  |
| 209                                           | 29       | 1    | 3002   | 0  | 0  | 500     | 0    | 3002   | 0   | 1   |  |
| 210                                           | 90       | 190  | 2449   | 1  | 5  | 500     | 180  | 2434   | 16  | 15  |  |
| 212                                           | 20       | 0    | 2746   | 0  | 0  | 500     | 0    | 2746   | 0   | 0   |  |
| 213                                           | 137      | 215  | 3008   | 20 | 5  | 500     | 157  | 3016   | 12  | 63  |  |
| 214                                           | 53       | 256  | 2003   | 0  | 0  | 500     | 254  | 2002   | 1   | 2   |  |
| 215                                           | 52       | 164  | 3197   | 0  | 0  | 500     | 164  | 3196   | 1   | 0   |  |
| 217                                           | 61       | 162  | 2045   | 0  | 0  | 500     | 159  | 2045   | 0   | 3   |  |
| 219                                           | 41       | 63   | 2089   | 0  | 1  | 500     | 52   | 2089   | 0   | 12  |  |
| 220                                           | 20       | 0    | 2045   | 0  | 0  | 500     | 0    | 2045   | 0   | 0   |  |
| 221                                           | 33       | 396  | 2030   | 0  | 0  | 500     | 393  | 2030   | 0   | 3   |  |
| 222                                           | 20       | 0    | 2480   | 0  | 0  | 500     | 0    | 2480   | 0   | 0   |  |
| 223                                           | 86       | 473  | 2123   | 7  | 0  | 500     | 321  | 2119   | 11  | 152 |  |
| 228                                           | 66       | 362  | 1690   | 0  | 0  | 500     | 356  | 1690   | 0   | 6   |  |
| 230                                           | 30       | 1    | 2253   | 0  | 0  | 500     | 0    | 2253   | 0   | 1   |  |
| 231                                           | 24       | 2    | 1567   | 0  | 0  | 500     | 2    | 1567   | 0   | 0   |  |
| 232                                           | 20       | 0    | 1779   | 0  | 0  | 500     | 0    | 1779   | 0   | 0   |  |
| 233                                           | 91       | 830  | 2246   | 0  | 0  | 500     | 810  | 2245   | 1   | 20  |  |
| 234                                           | 26       | 3    | 2749   | 0  | 0  | 500     | 0    | 2749   | 0   | 3   |  |
| Totals                                        | 2148     | 7169 | 102573 | 47 | 66 | 24000   | 6540 | 102427 | 193 | 695 |  |

The inconsistency was in the per-record TN column of the Proposed method; the final result and totals remain unchanged.
